# Supplementary material for: Nickel cobalt selenides on black phosphorene with fast electron transport for high-energy density sodium-ion half/full batteries
Source: Royal Society of Chemistry journal article supplement (doi:10.1039/d2qi01932a), 2022-11-19
Supplement: d2qi01932a1.pdf [file d2qi01932a1.pdf]

**Nickel cobalt selenides on black phosphorene with fast electron transportation for high-energy density sodium-ion half/full batteries**

Jun Yang<sup>a,b,†</sup>, Chenrui Zhang<sup>c,e,†</sup>, Jitao Geng<sup>c</sup>, Yangyang Sui<sup>c</sup>, Huaixin Wei<sup>d</sup>,

Chencheng Sun<sup>a\*</sup>, Hongbo Geng<sup>c\*</sup>, Yushen Liu<sup>a\*</sup>

<sup>a</sup>School of Electronic and Information Engineering, Changshu Institute of Technology, Changshu, 215500, Jiangsu, China.

E-mail address: [ccsun@csit.edu.cn](mailto:ccsun@csit.edu.cn); [ysliu@csit.edu.cn](mailto:ysliu@csit.edu.cn)

<sup>b</sup>School of Material Science & Engineering, Jiangsu University of Science and Technology, Zhenjiang, 212003, China

<sup>c</sup>School of Materials Engineering, Jiangsu Key Laboratory of Advanced Functional Materials, Changshu Institute of Technology, Changshu, Jiangsu 215500, China. E-mail address: [hbgeng@gdut.edu.cn](mailto:hbgeng@gdut.edu.cn)

<sup>d</sup>School of Chemistry and Life Sciences, Suzhou University of Science and Technology, Suzhou, Jiangsu 215009, China

<sup>e</sup>BTR New Material Group Co., Ltd., Shenzhen 518000, China

<sup>†</sup>These authors contributed equally.

---

## Table of contents

**Fig S1.** XRD pattern of BP@Ni(OH)<sub>2</sub>/Co(OH)<sub>2</sub> precursor.

**Fig S2.** XRD pattern of as prepared pure Ni<sub>3</sub>Se<sub>4</sub>/CoSe<sub>2</sub>.

**Fig S3.** XPS survey spectrum of BP@Ni<sub>3</sub>Se<sub>4</sub>/CoSe<sub>2</sub>.

**Fig S4.** XPS spectra of Se 3d in BP@Ni<sub>3</sub>Se<sub>4</sub>/CoSe<sub>2</sub>.

**Fig S5.** Energy Dispersive Spectrometer (EDS) of BP@Ni<sub>3</sub>Se<sub>4</sub>/CoSe<sub>2</sub> and Ni<sub>3</sub>Se<sub>4</sub>/CoSe<sub>2</sub>.

**Fig S6.** Nitrogen adsorption-desorption isotherm of BP@Ni<sub>3</sub>Se<sub>4</sub>/CoSe<sub>2</sub> and Ni<sub>3</sub>Se<sub>4</sub>/CoSe<sub>2</sub>.

**Fig S7.** GCD curves of BP@Ni<sub>3</sub>Se<sub>4</sub>/CoSe<sub>2</sub> at different current densities.

**Fig S8.** Comparison of coulombic efficiency for the first 5 cycles.

**Fig S9.** Cycling performance of BP@Ni<sub>3</sub>Se<sub>4</sub>/CoSe<sub>2</sub> at 0.2 A g<sup>-1</sup>.

**Fig S10.** Rate performance comparison of previously reported transition metal selenide-based electrode.

**Fig S11.** Rate and cycle stability of BP@Ni<sub>3</sub>Se<sub>4</sub>/CoSe<sub>2</sub> using NaClO<sub>4</sub> in EC/DMC as electrolyte.

**Fig S12.** Comparison of GITT curves of the cycled electrode.

**Fig S13.** Nyquist plots for the electrodes of BP@Ni<sub>3</sub>Se<sub>4</sub>/CoSe<sub>2</sub> and pure Ni<sub>3</sub>Se<sub>4</sub>/CoSe<sub>2</sub>.

**Fig S14.** Morphology, crystal structure and performance in sodium ion batteries of NVPOF.

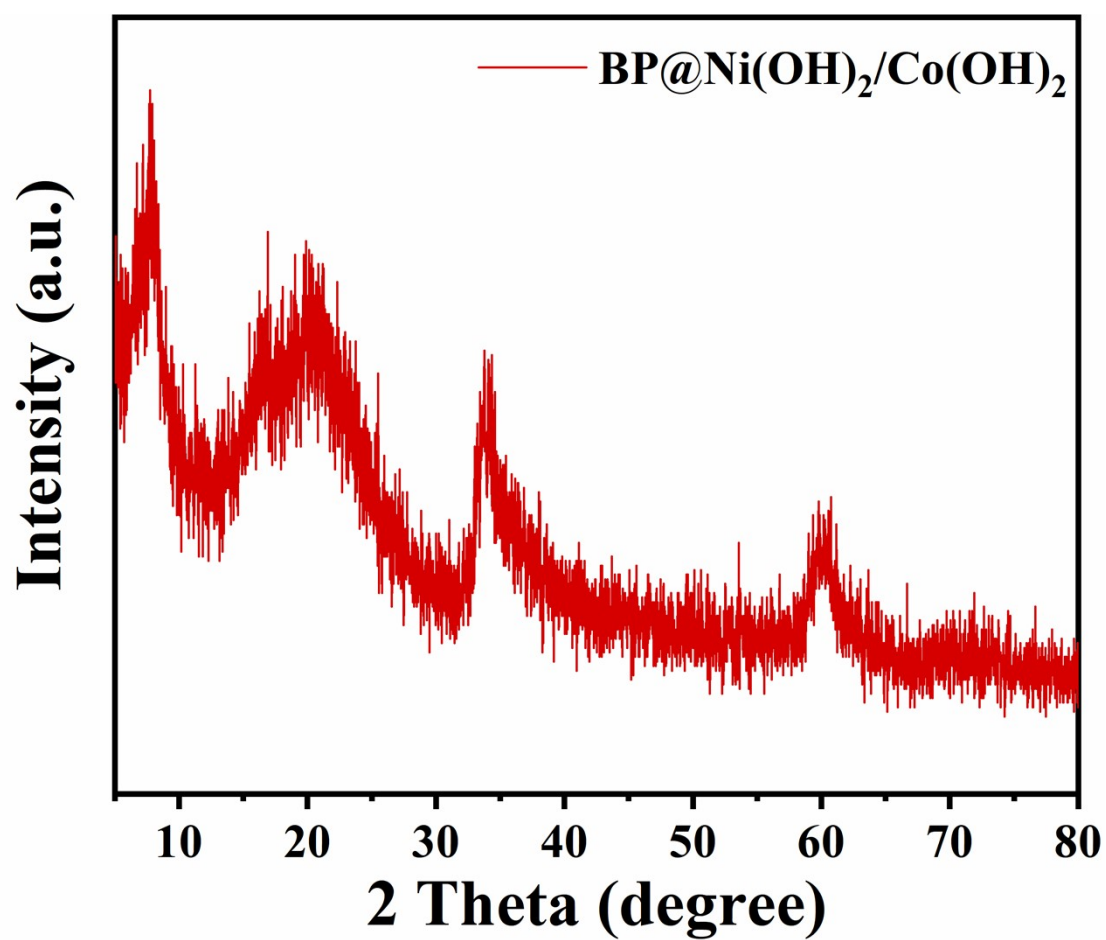

Fig S1. XRD pattern of BP@Ni(OH)<sub>2</sub>/Co(OH)<sub>2</sub> precursor.

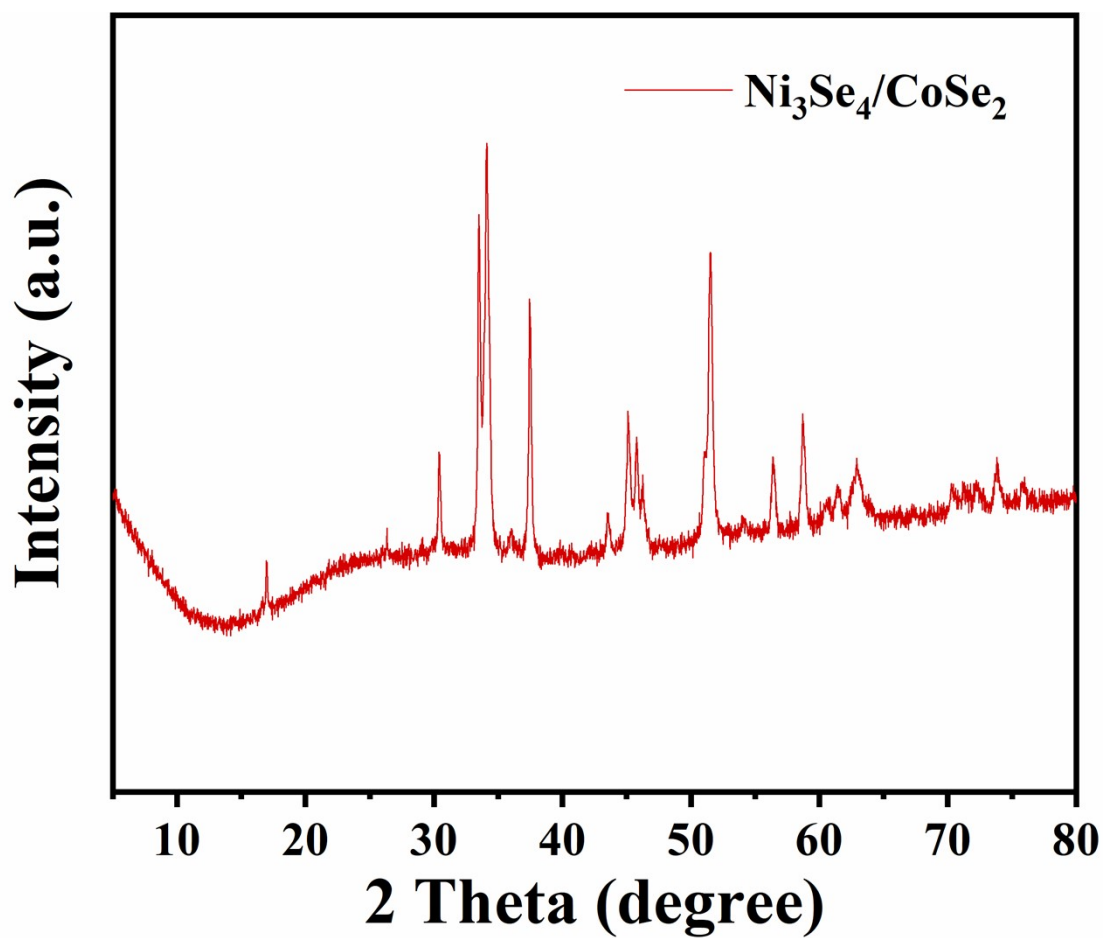

Fig S2. XRD pattern of as prepared pure Ni<sub>3</sub>Se<sub>4</sub>/CoSe<sub>2</sub>.

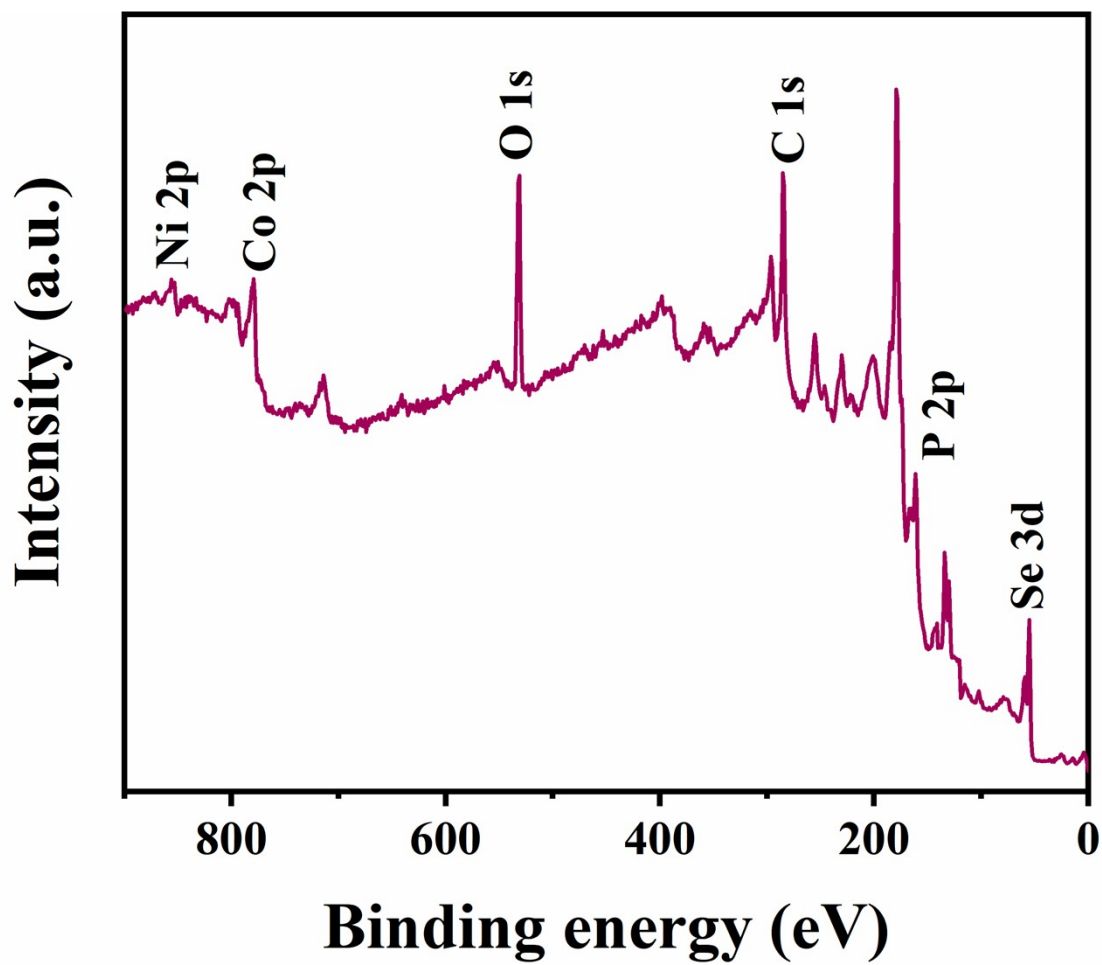

Fig S3. XPS survey spectrum of BP@Ni<sub>3</sub>Se<sub>4</sub>/CoSe<sub>2</sub>.

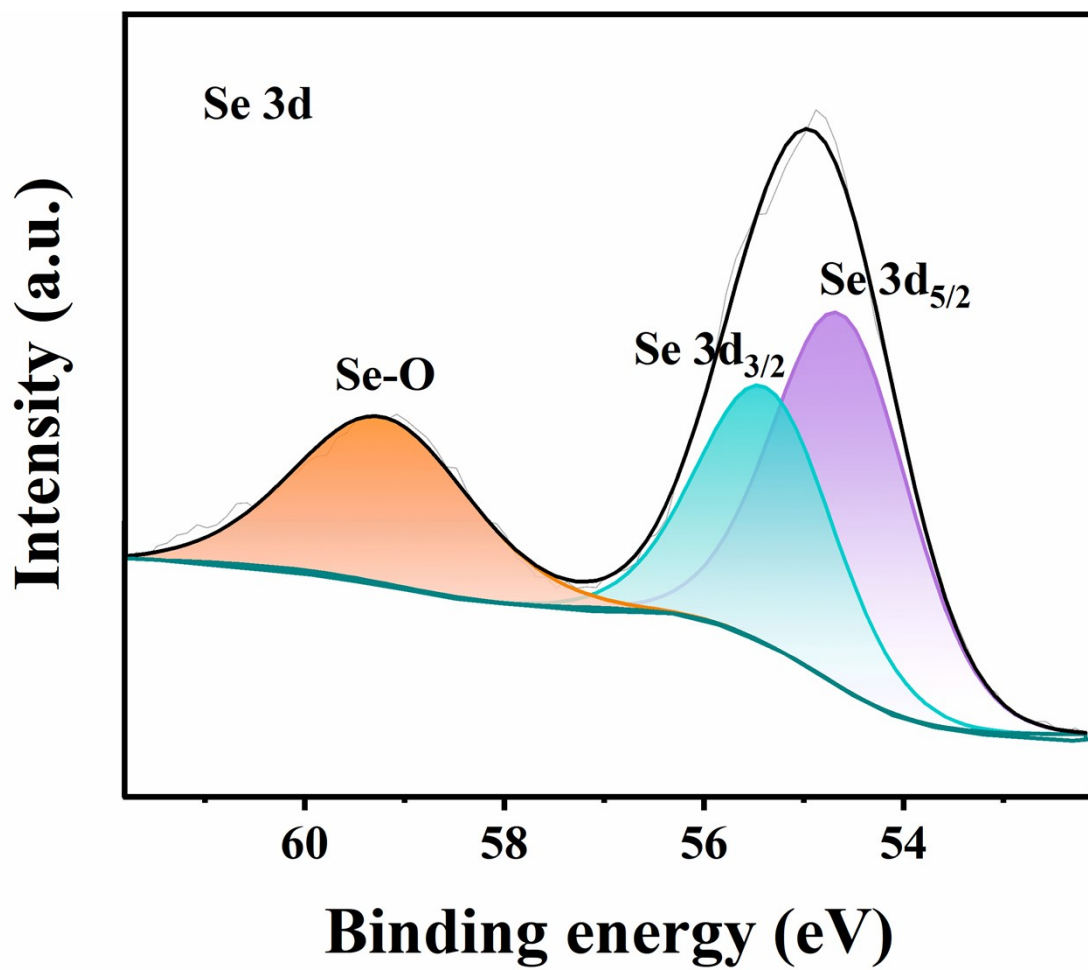

Fig S4. XPS spectra of Se 3d in BP@Ni<sub>3</sub>Se<sub>4</sub>/CoSe<sub>2</sub>.

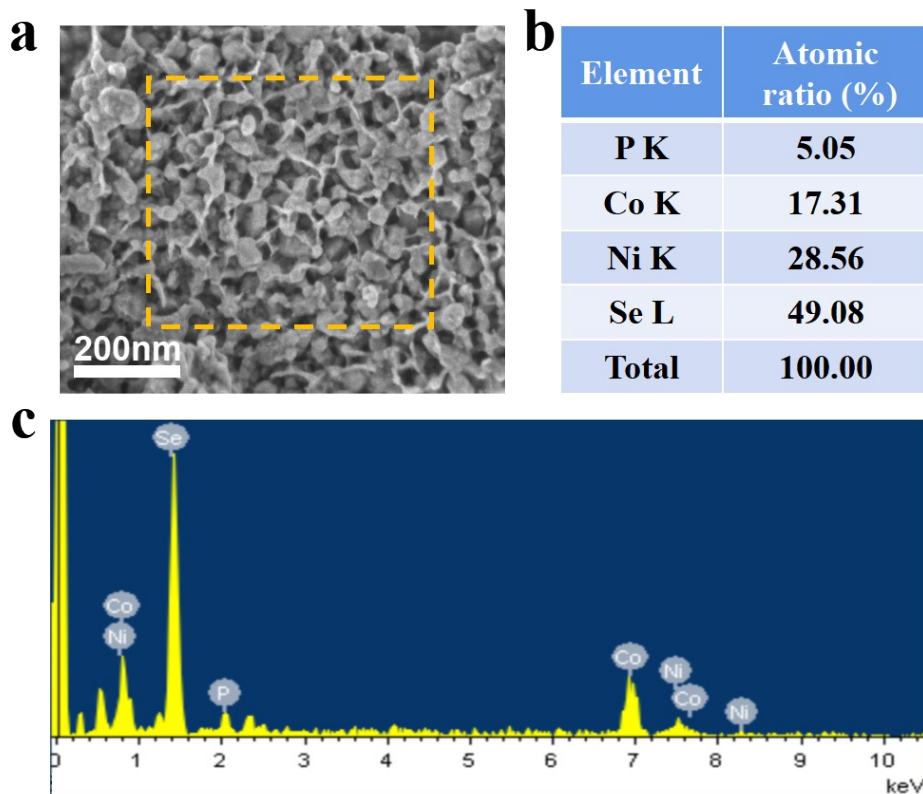

**Fig S5.** Energy dispersive spectrometer (EDS) of BP@Ni<sub>3</sub>Se<sub>4</sub>/CoSe<sub>2</sub>. The mole ratio of BP, Ni<sub>3</sub>Se<sub>4</sub> and CoSe<sub>2</sub> is about 17.1 %, 31.1 %, 51.8 % based on the atomic ratio.

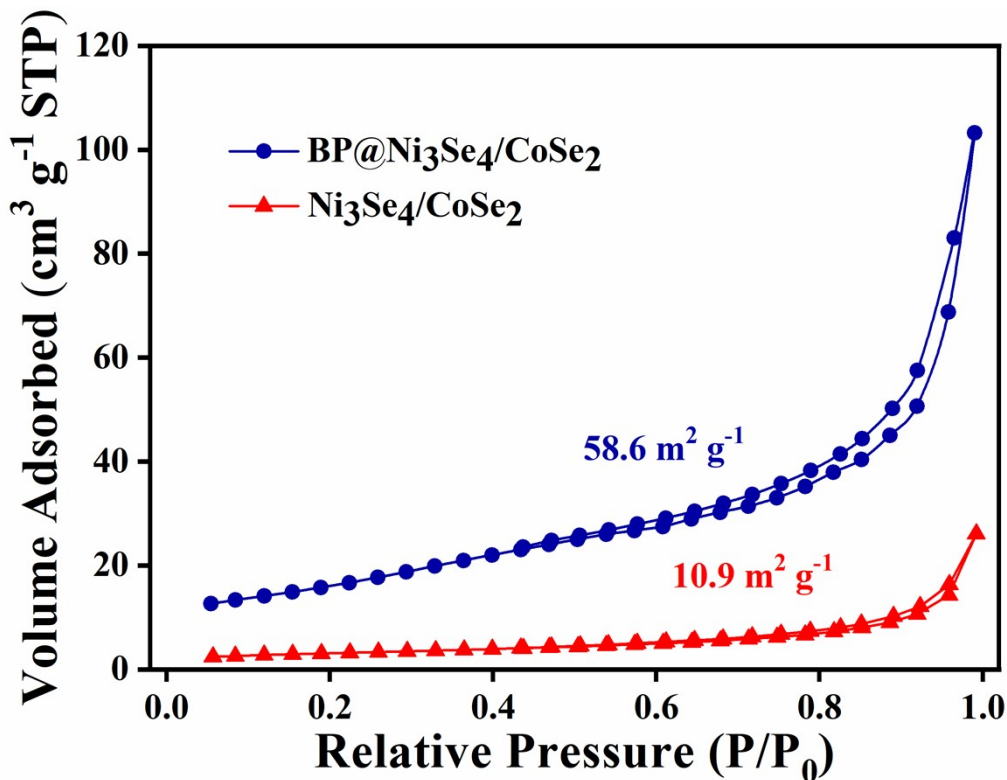

**Fig S6.** Nitrogen adsorption-desorption isotherms of BP@Ni<sub>3</sub>Se<sub>4</sub>/CoSe<sub>2</sub> and Ni<sub>3</sub>Se<sub>4</sub>/CoSe<sub>2</sub>.

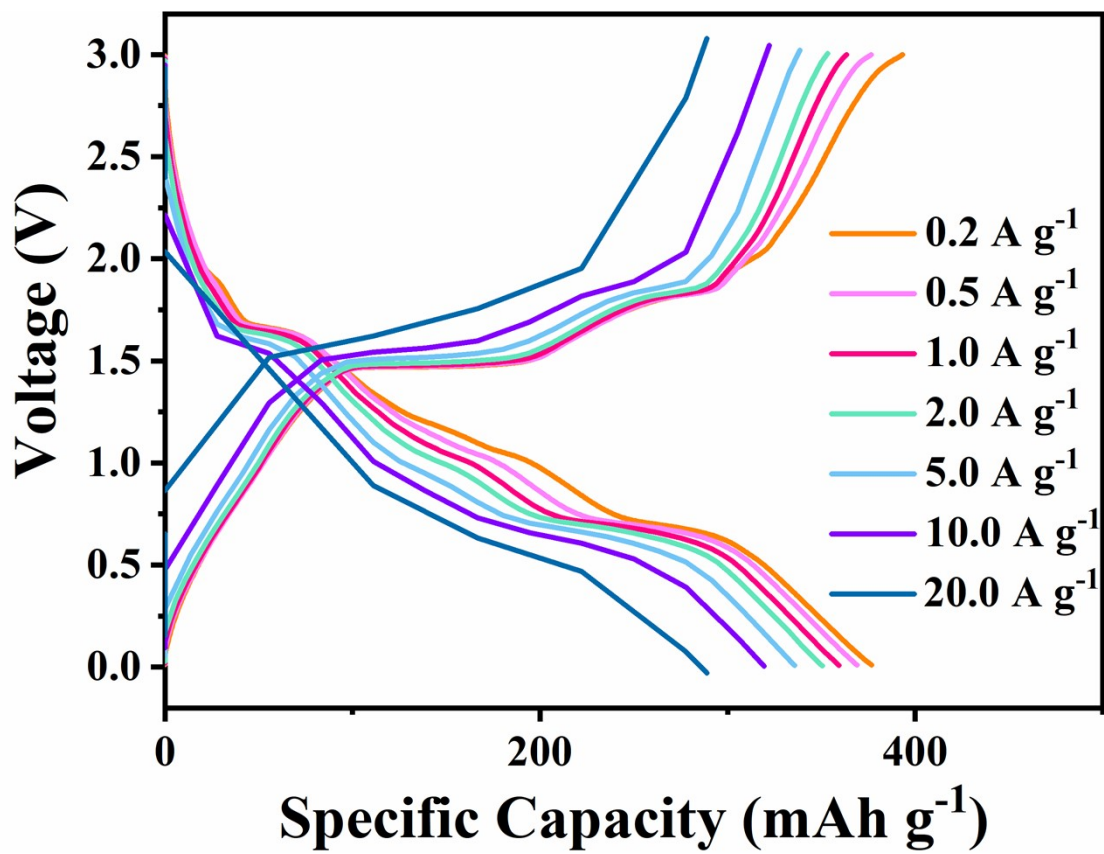

Fig S7. GCD curves of BP@Ni<sub>3</sub>Se<sub>4</sub>/CoSe<sub>2</sub> at different current densities.



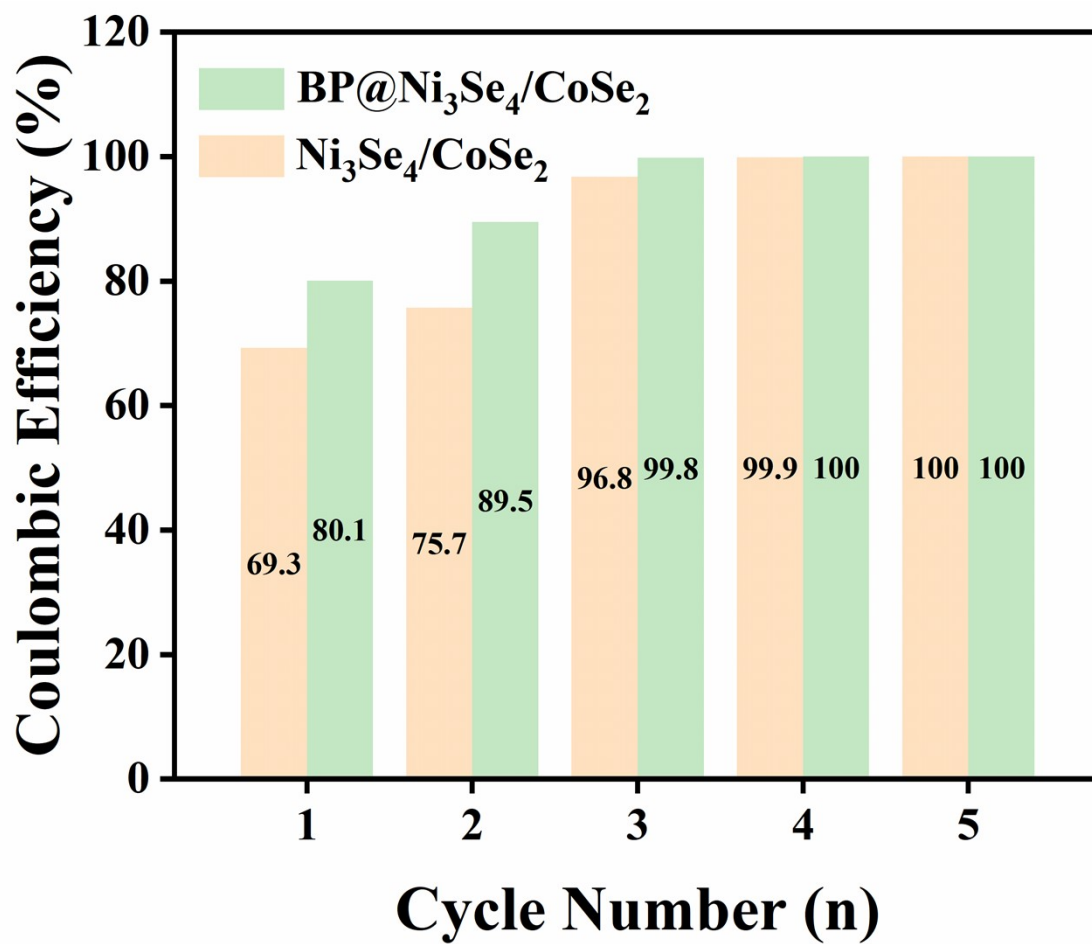

Fig S8. Comparison of coulombic efficiency for the first 5 cycles.

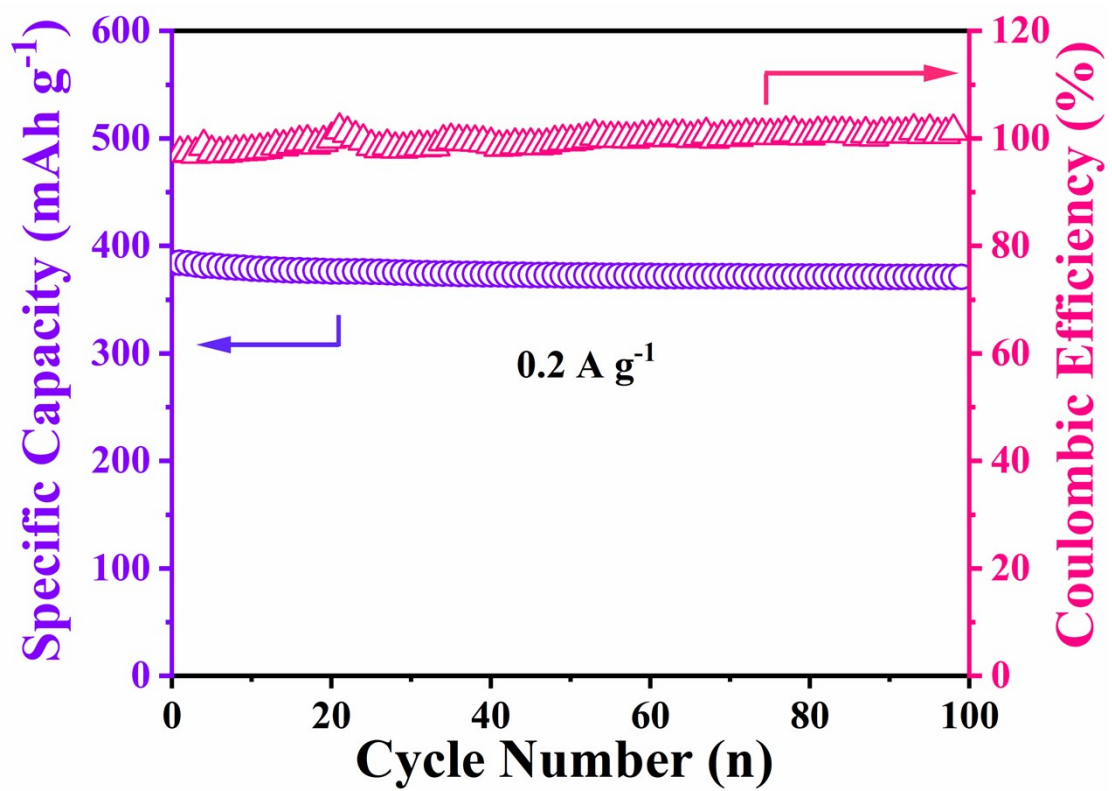

Fig S9. Cycling performance of BP@Ni<sub>3</sub>Se<sub>4</sub>/CoSe<sub>2</sub> at 0.2 A g<sup>-1</sup>.

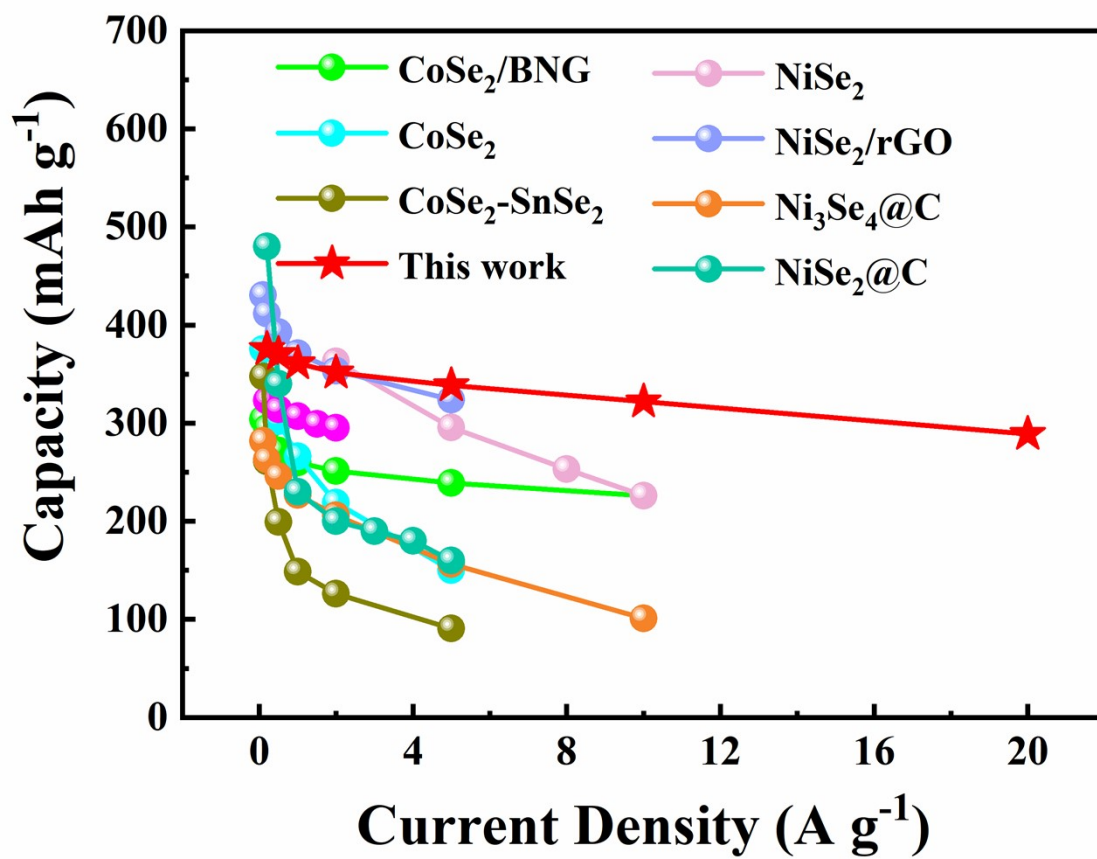

Fig S10. Rate performance comparison of previously reported transition metal selenide-based electrode.

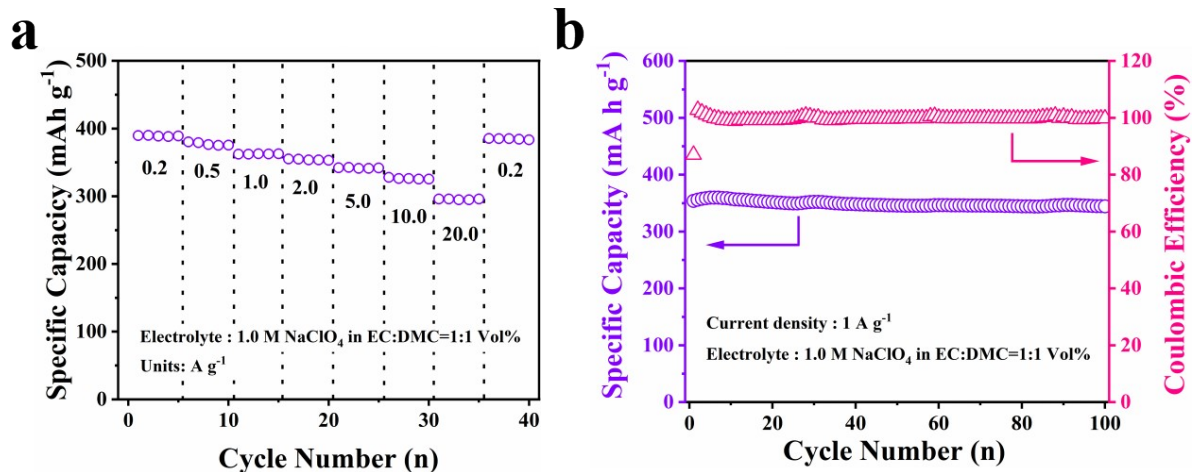

**Fig S11.** Rate and cycle stability of BP@Ni<sub>3</sub>Se<sub>4</sub>/CoSe<sub>2</sub> using NaClO<sub>4</sub> in EC/DMC as electrolyte.

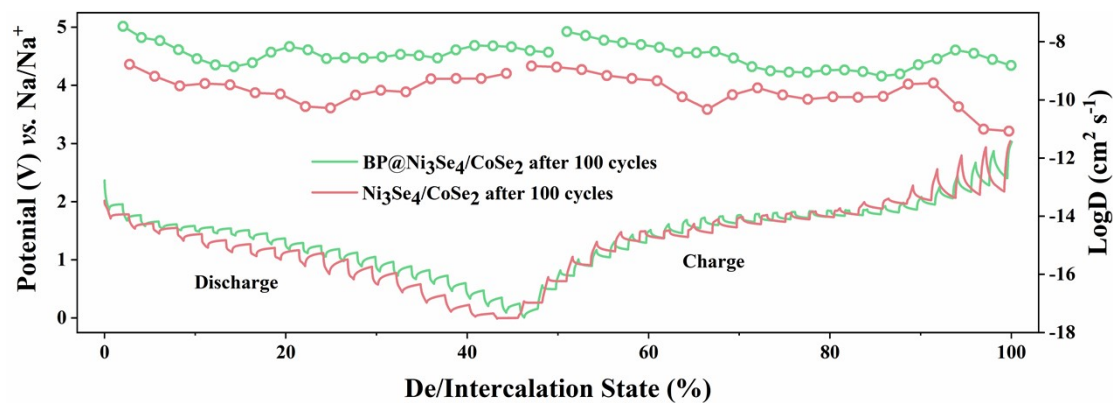

**Fig S12.** Comparison of GITT curves of the cycled electrode.

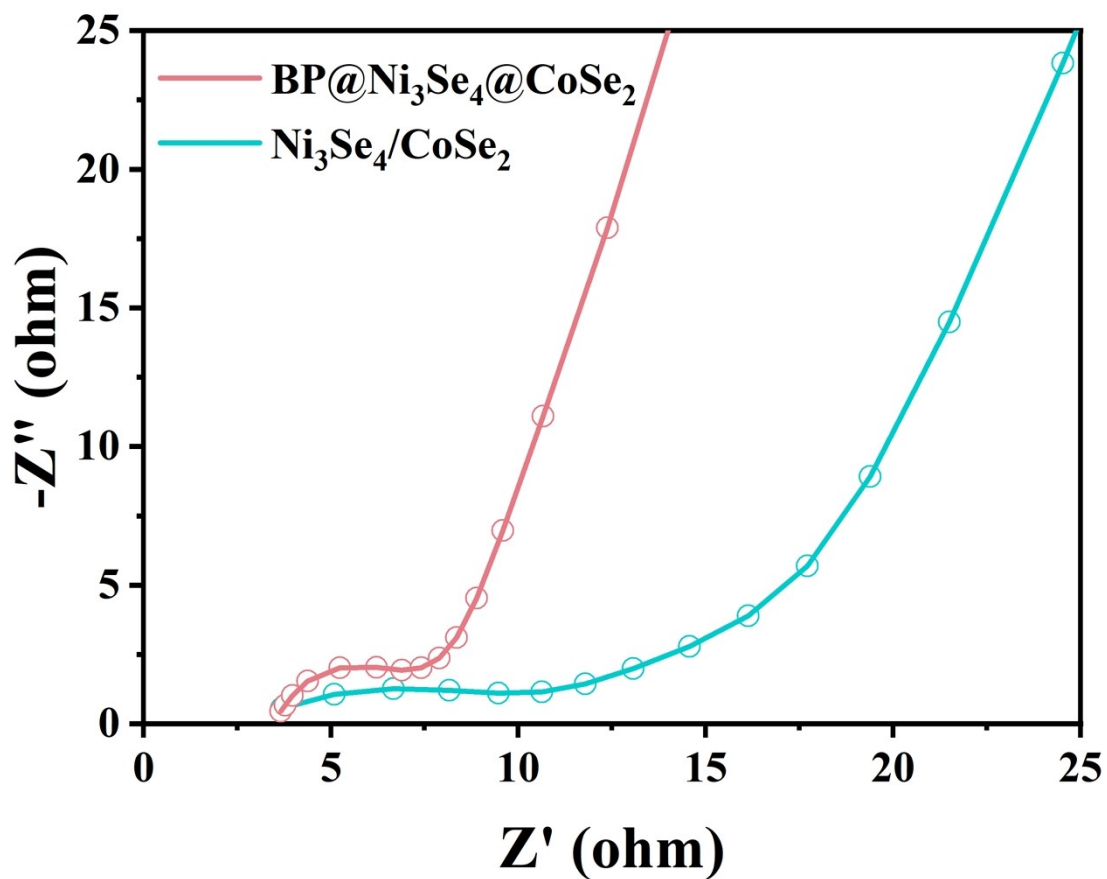

Fig S13. Nyquist plots for the electrodes of BP@Ni<sub>3</sub>Se<sub>4</sub>/CoSe<sub>2</sub> and pure Ni<sub>3</sub>Se<sub>4</sub>/CoSe<sub>2</sub>.

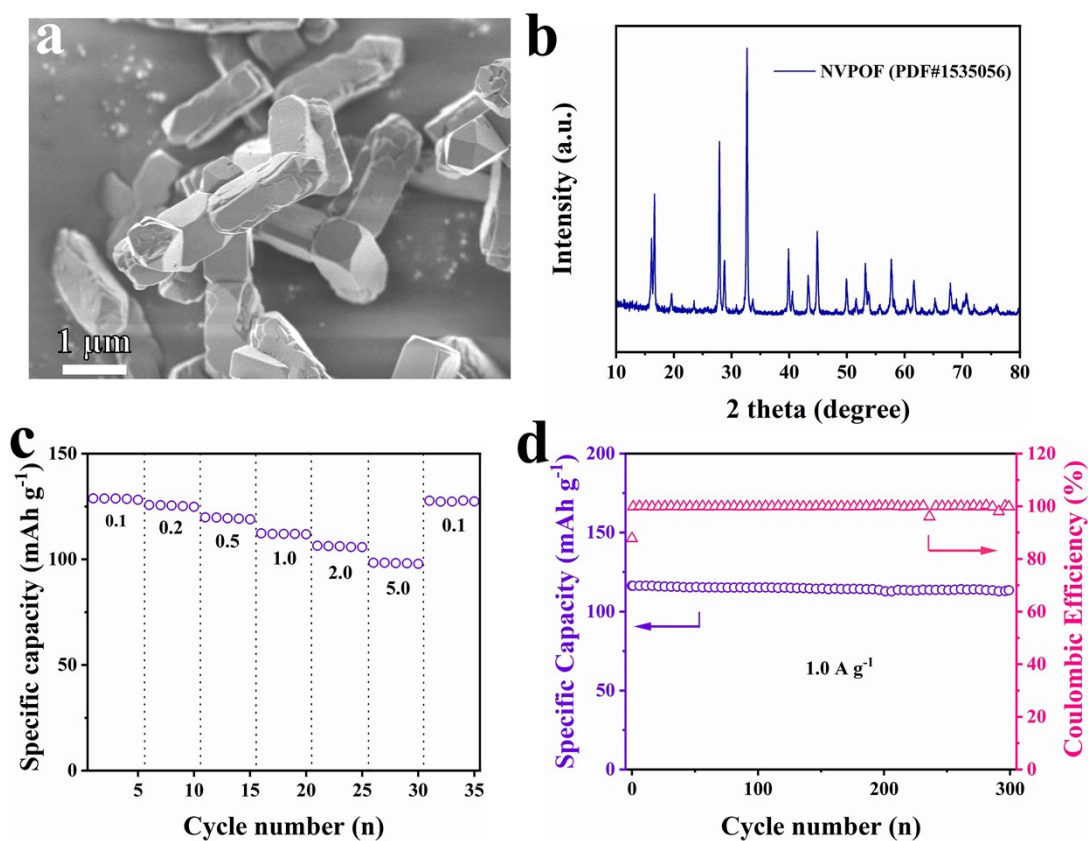

---

**Fig S14.** Characterization of NVPOF. (a) SEM image. (b) XRD pattern. (c) rate performance and (d) cycle stability.
